# Supplementary material
Source: HighWire-hosted journal article supplement (https://bmjopen.bmj.com/content/9/10/e024595)

A

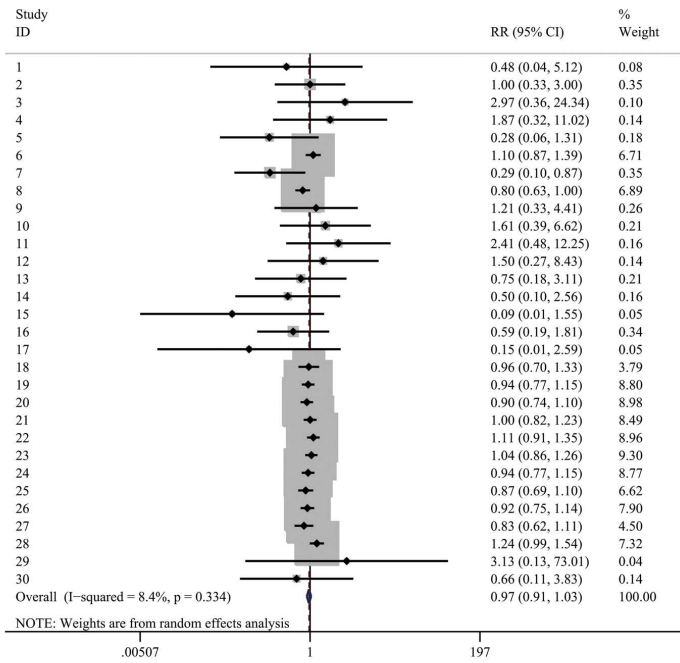

B

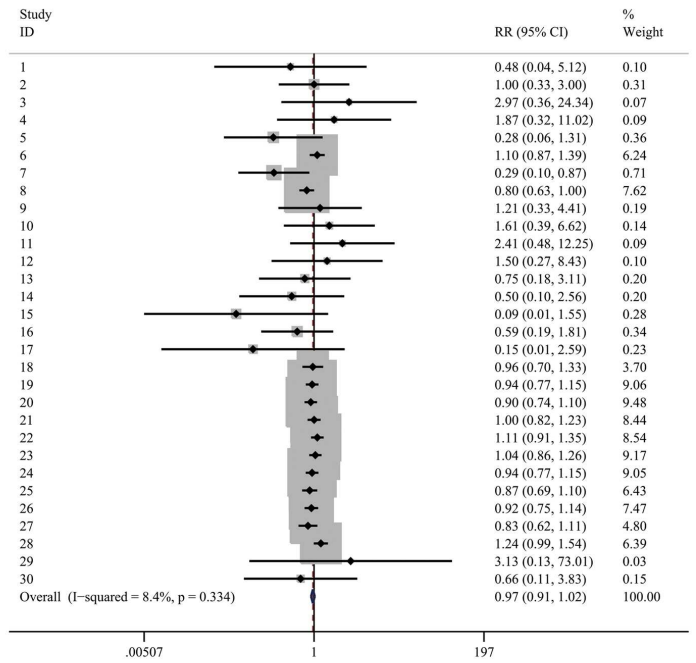

Supplement: inline-supplementary-material-13 [file inline-supplementary-material-13.pdf]

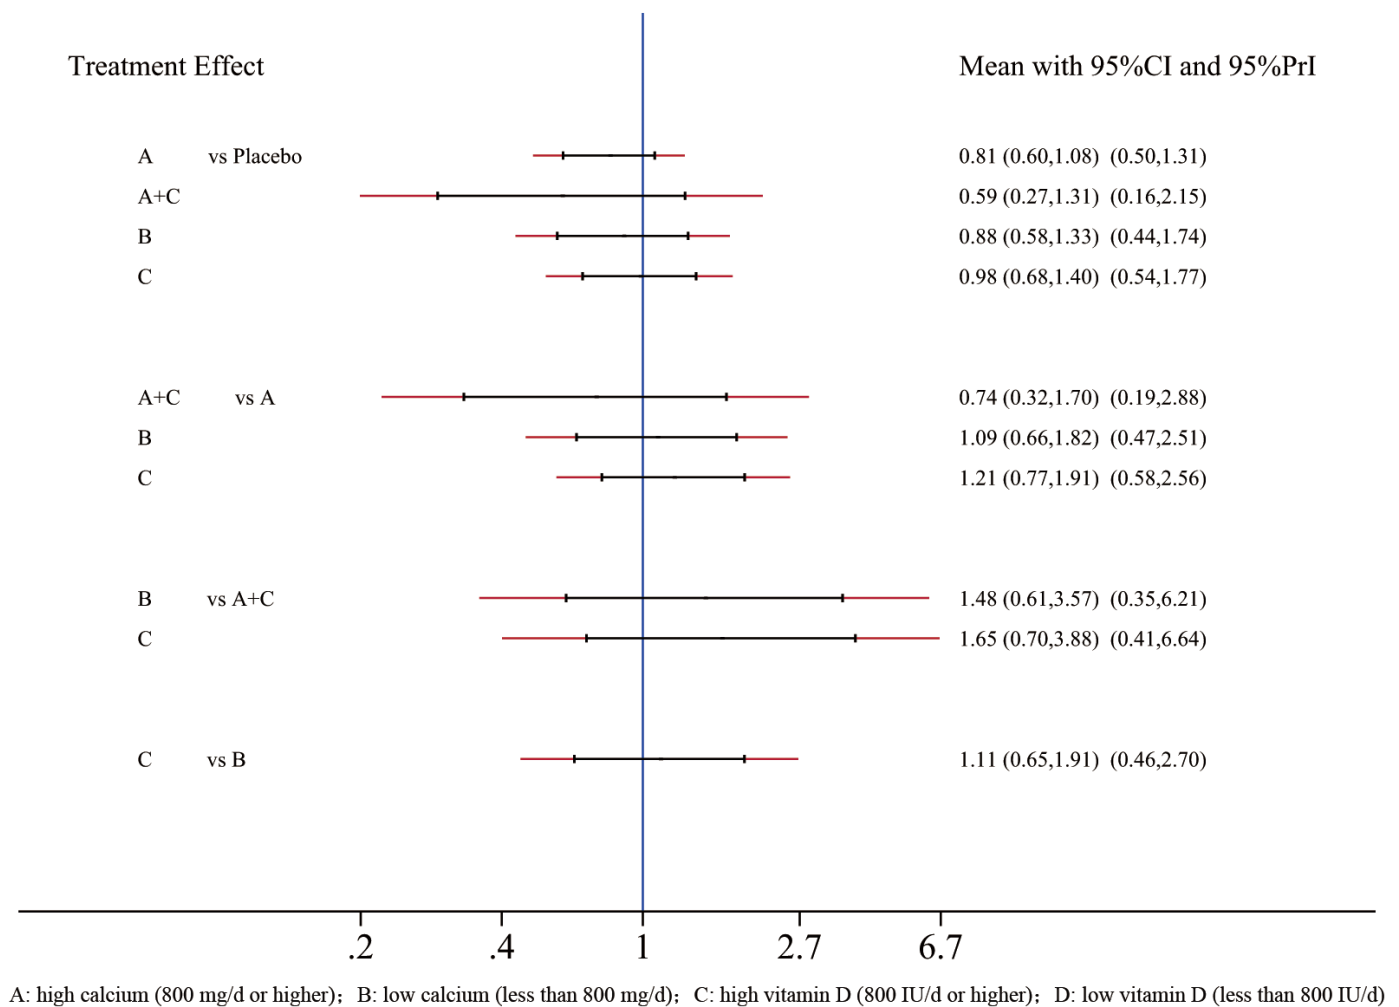

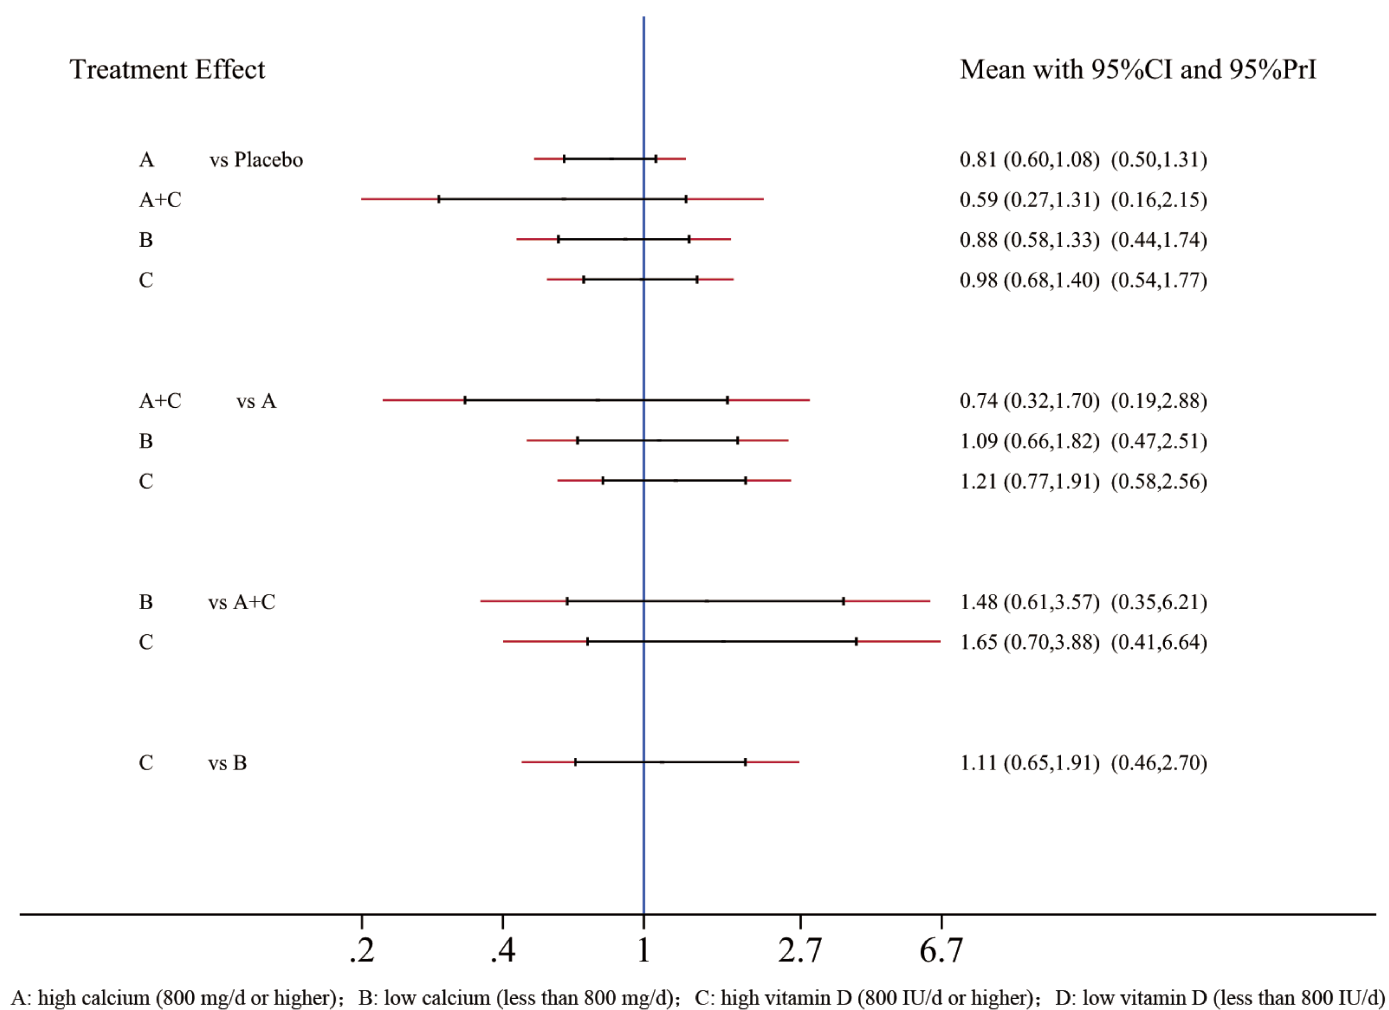

Supplement: inline-supplementary-material-5 [file inline-supplementary-material-5.pdf]

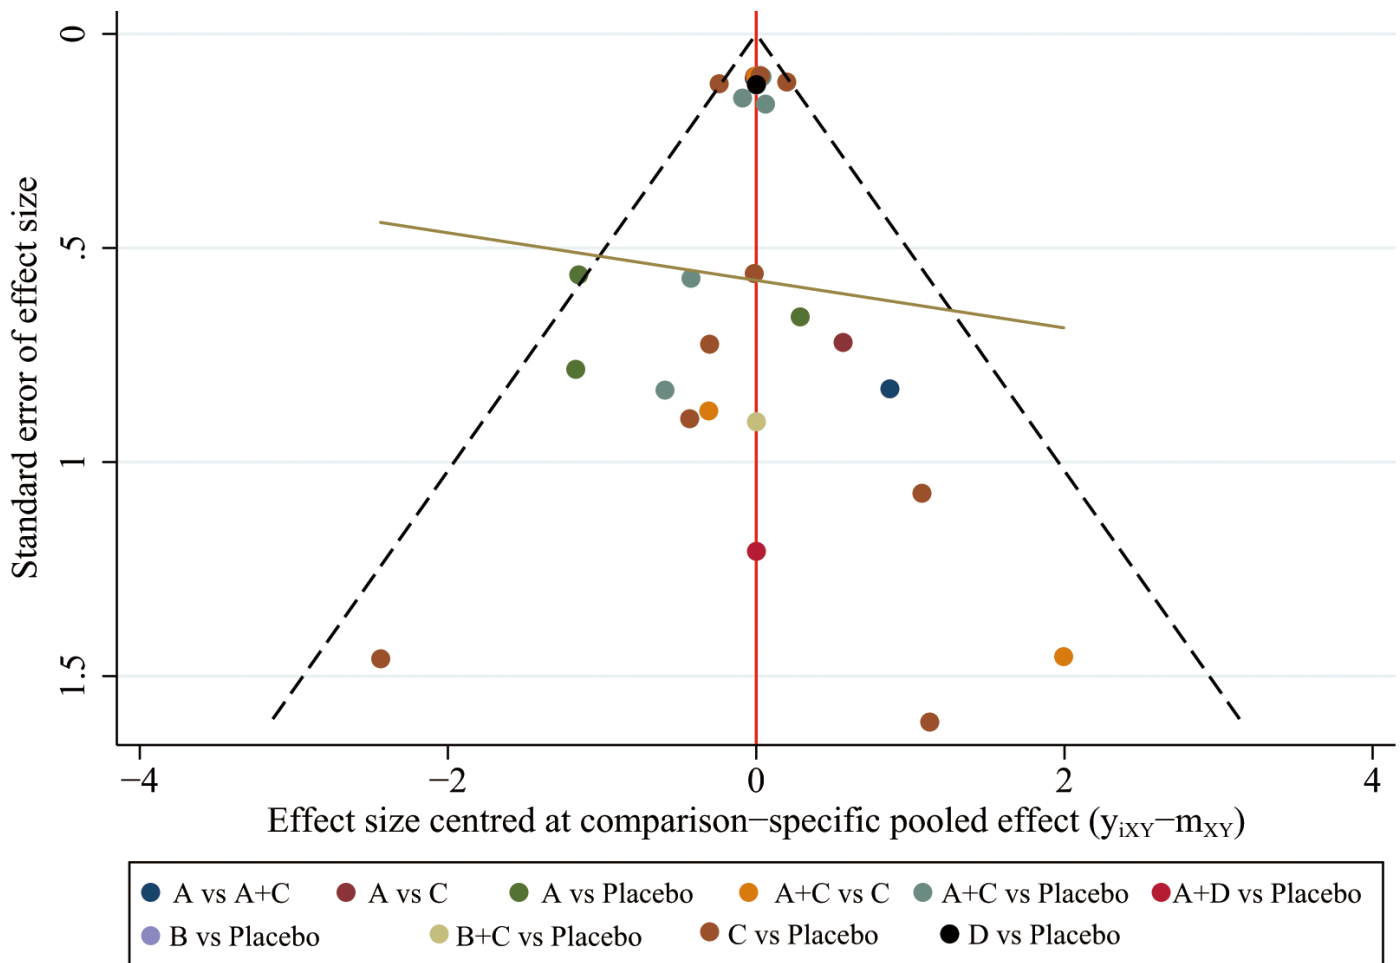

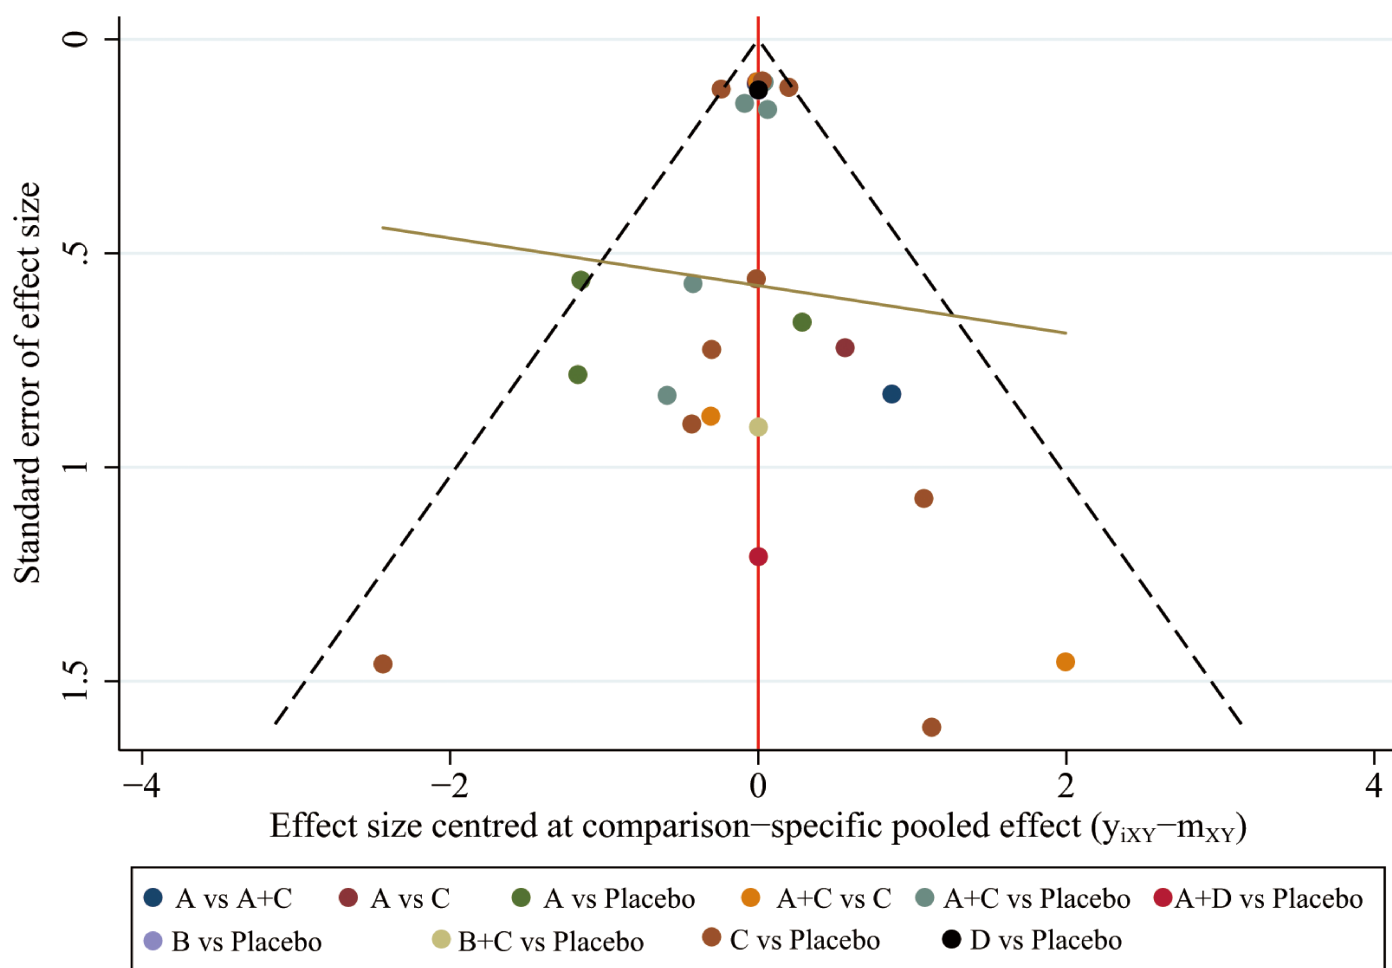

Supplement: inline-supplementary-material-7 [file inline-supplementary-material-7.pdf]

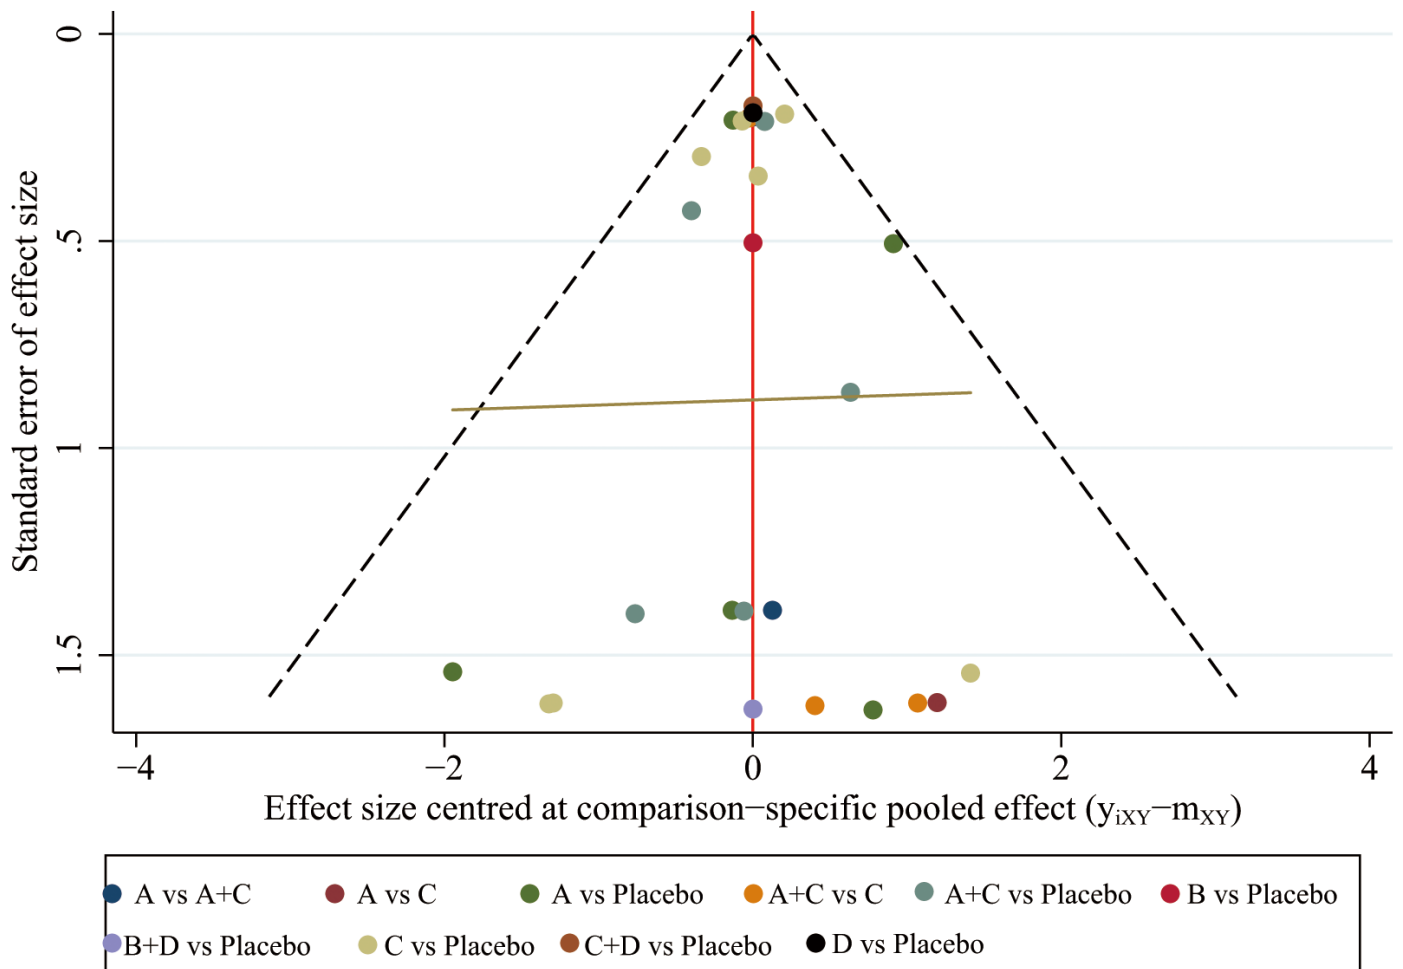

Figure 1

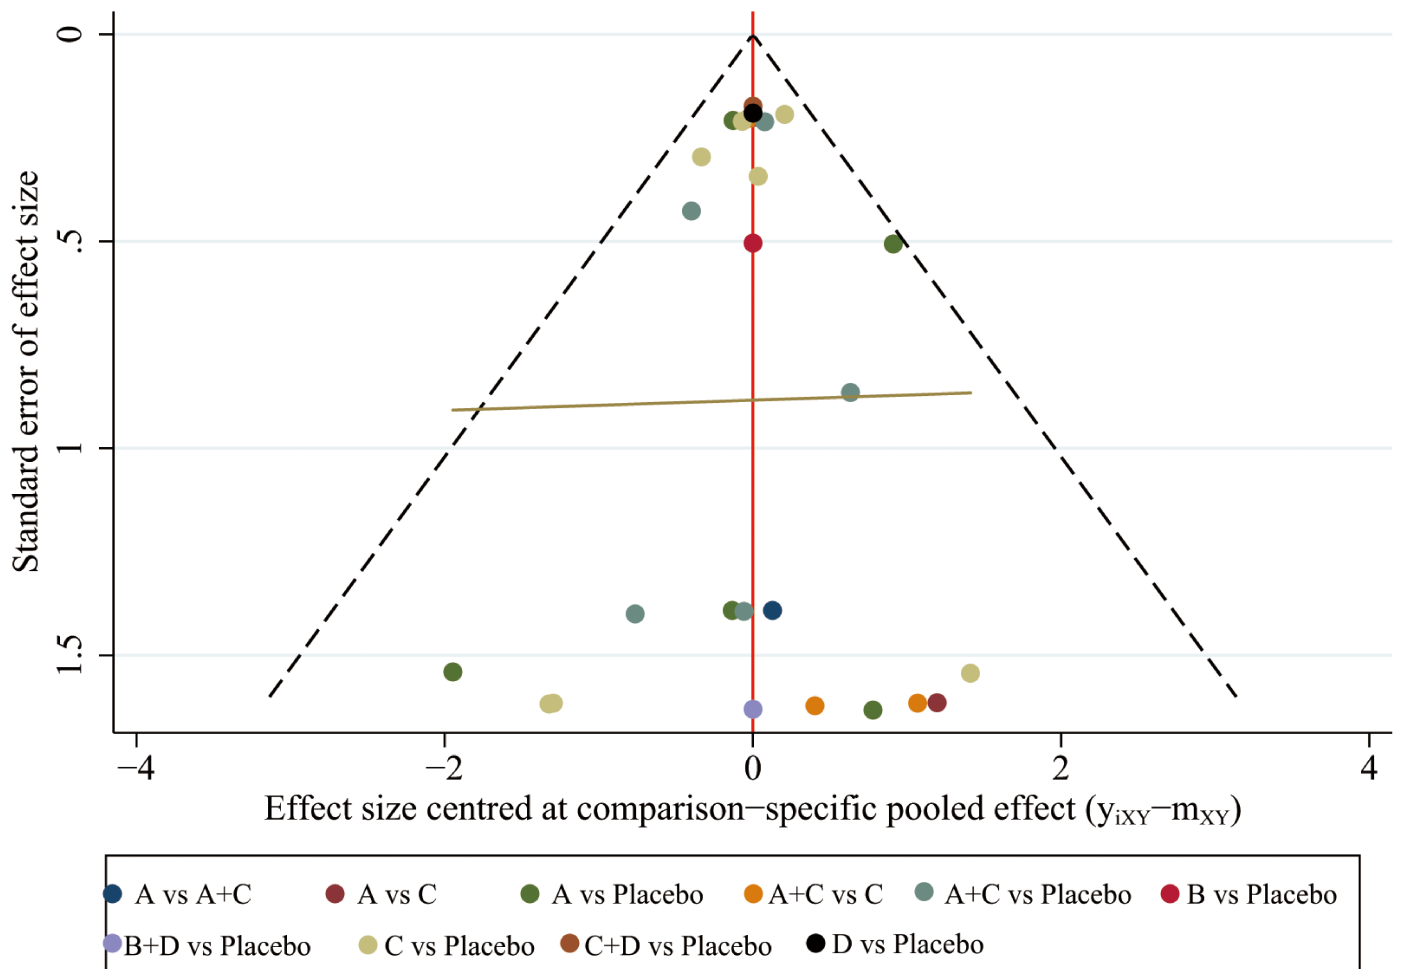

Supplement: inline-supplementary-material-8 [file inline-supplementary-material-8.pdf]

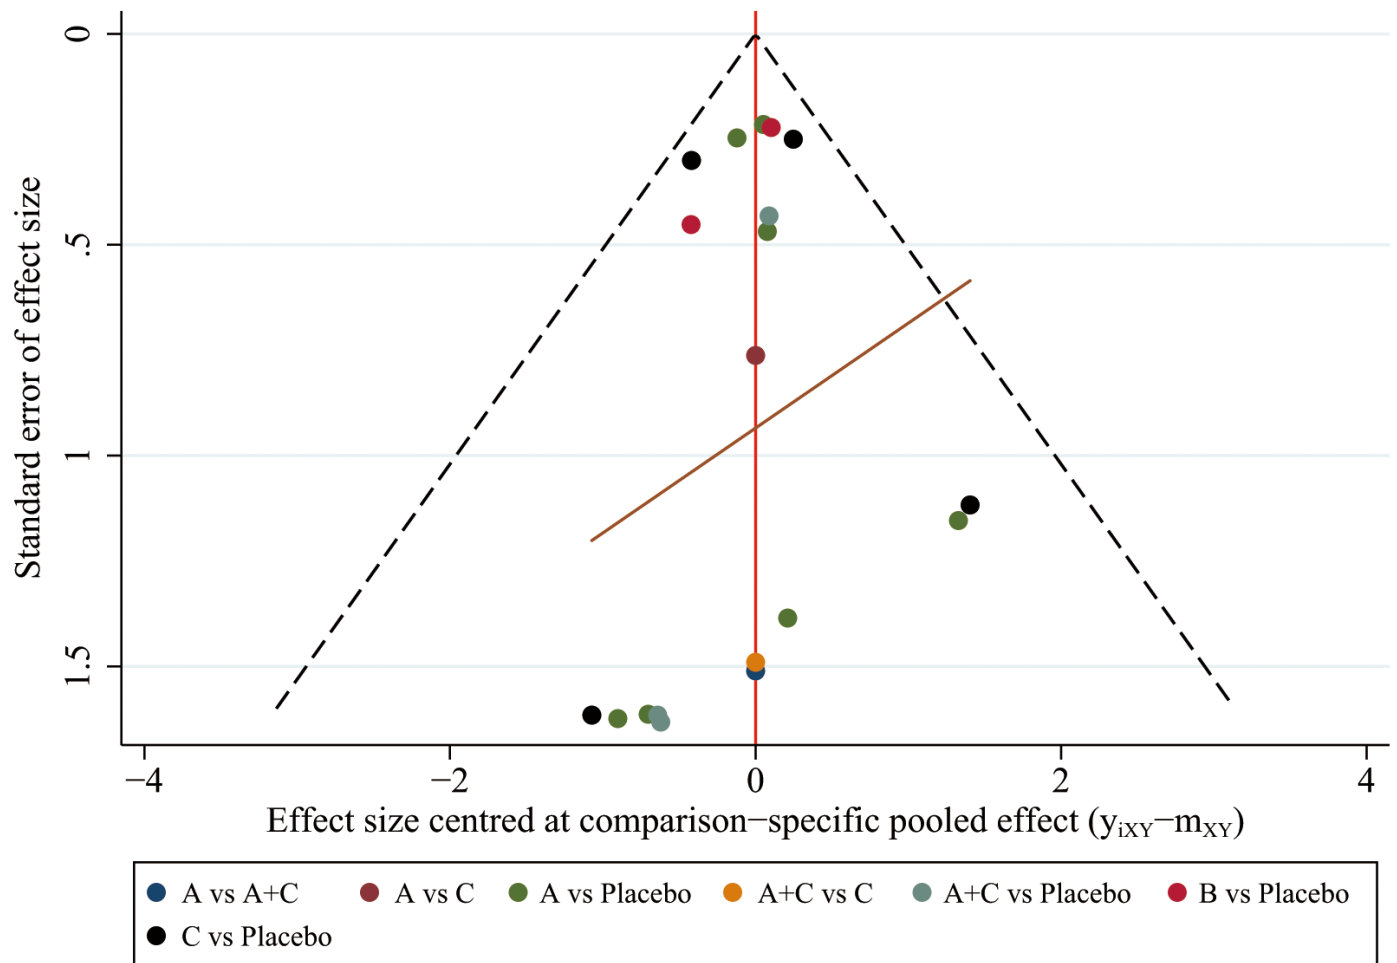

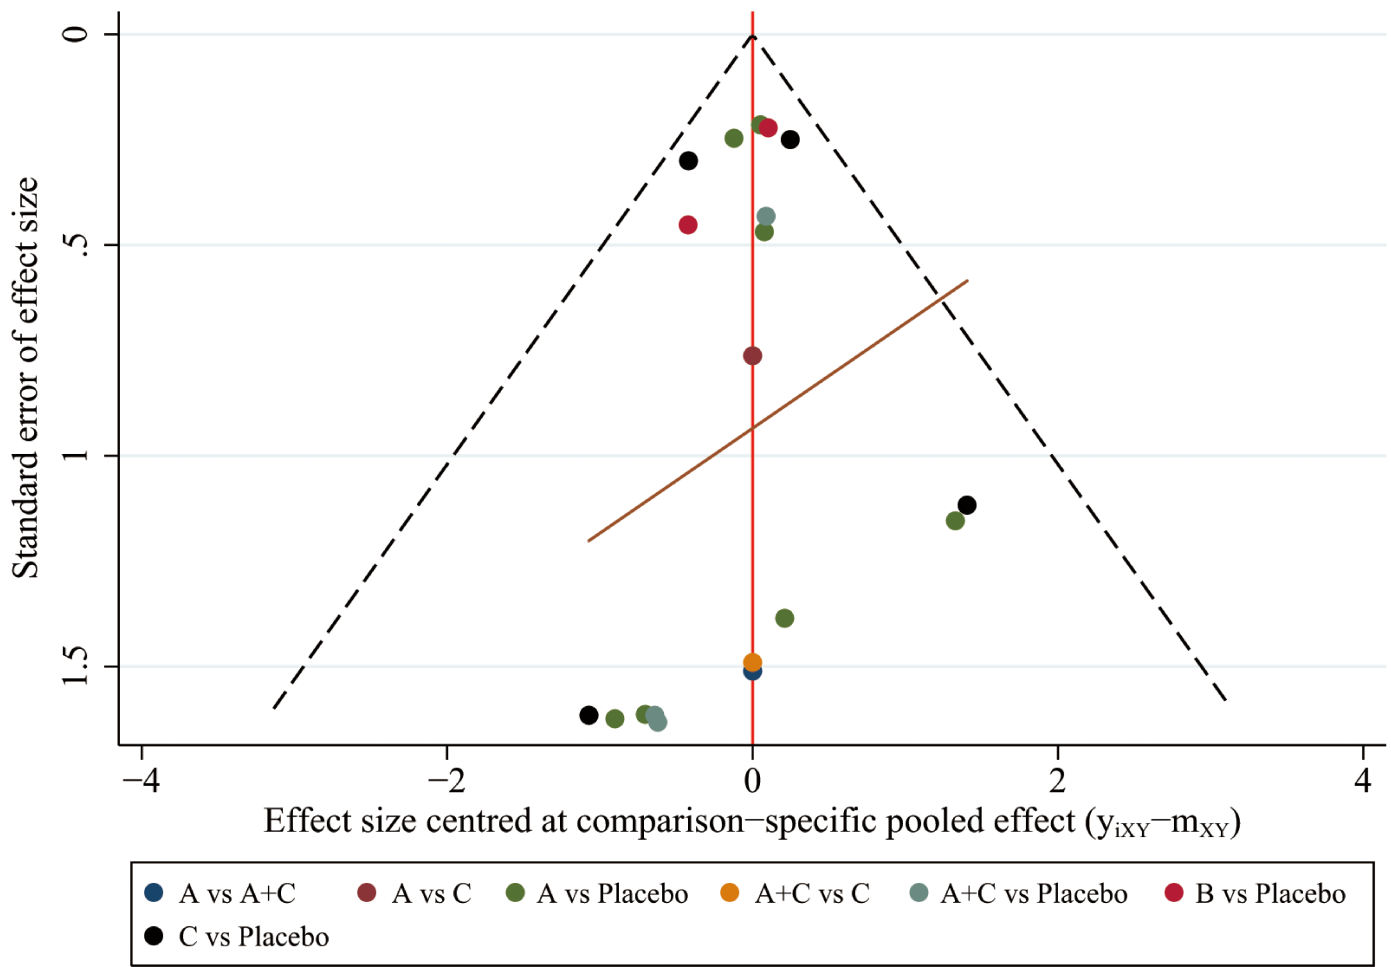

Supplement: inline-supplementary-material-9 [file inline-supplementary-material-9.pdf]
